# Supplementary material for: UV resonance Raman spectroscopic monitoring of supramolecular complex formation: peptide recognition in aqueous solution
Source: Royal Society of Chemistry journal article supplement (doi:10.1039/b709142g), 2007-01-01
Supplement: b709142g.pdf [file b709142g.pdf]

## Supporting information

Quantum chemical calculations on the model compound CBS-C(O)-NH<sub>2</sub> were performed at the B3LYP/6-311++G(d,p) level of theory, employing the polarizable continuum model (PCM) with water in order to simulate the aqueous environment.<sup>16</sup> Figure S1 shows four selected eigenvectors of conformer B (Figure 6), which are assigned to the Raman bands (A)-(D) in Figure 3. Figure S1-A exhibits an amide I

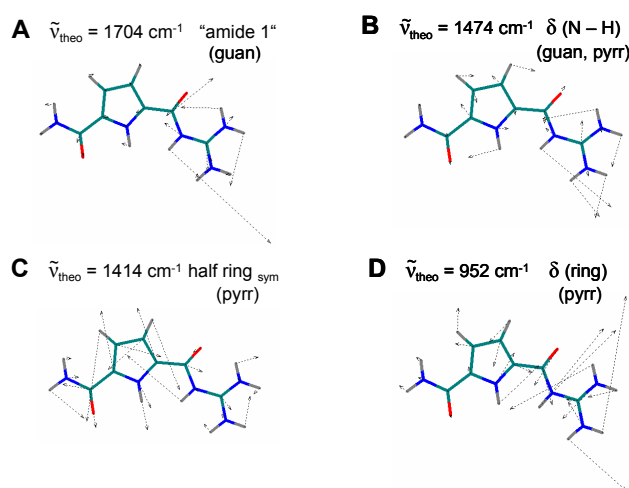

**Fig. S1** Selected vibrational modes of the model compound CBS-C(O)-NH<sub>2</sub> obtained from a DFT calculation (B3LYP/6-311G++(d,p), PCM with water).

like vibration at  $1704 \text{ cm}^{-1}$ , which has C=O stretching components predominantly located at the guanidiniocarbonyl part of the CBS. The excellent agreement between theory (DFT/PCM with water:  $1704 \text{ cm}^{-1}$ ) and experiment (4 mM in water:  $1702 \text{ cm}^{-1}$ ) is noted; in the calculated gas phase spectrum, this normal mode occurs at  $1719 \text{ cm}^{-1}$ .

The normal mode in Figure S1-B comprises of N-H bending motions of both the guanidinio unit and the pyrrole ring and this mode occurs at  $1474 \text{ cm}^{-1}$  (region B in Figure 5); it is expected to be sensitive to hydrogen bonding and substrate complexation. In contrast, the symmetrical half ring vibration of pyrrole at  $1414 \text{ cm}^{-1}$  shown in Figure S1-C should not be very sensitive to hydrogen bonding or substrate binding. It was for this reason that this band was used for normalization of the experimental Raman spectra as discussed above (band C in Figure 5). Figure S1-D depicts a normal mode occurring in region labeled as D in Figure 5; it also comprises of N-H deformations, which are predominantly located at the guanidinio carbonyl unit and should therefore be sensitive to substrate binding.
